# Supplementary material for: Kappa Index predicts disease activity and transition to high-efficacy therapies in multiple sclerosis
Source: publisher site journal article supplement (doi:10.1515/cclm-2025-1339), 2025-12-27
Supplement: Supplementary file 1 [file j_cclm-2025-1339_suppl_001.docx]

**Supplementary Table 1.** Baseline and follow-up characteristics of the study population based on Kappa Index value.

| **Variable** | **Kappa Index<38**  **(nr=56)** | **Kappa Index≥38**  **(nr=64)** | **p-value** | **Kappa Index<100**  **(nr=86)** | **Kappa Index≥100**  **(nr=34)** | **p-value** |
| --- | --- | --- | --- | --- | --- | --- |
| Sex, n (%)  Male  Female | 18 (32.14)  38 (67.86) | 18 (28.12)  46 (71.88) | 0.632 | 25 (29.07)  61 (70.93) | 11 (67.65)  23 (32.35) | 0.724 |
| Age at onset, mean (SD) | 36.86 (10.93) | 33.62 (11.60) | 0,120 | 35.88 (11.77) | 33.24 (10.16) | 0.251 |
| OCB presence, n (%)  Yes  No | 44 (78.57)  12 (21.43) | 64 (100.00)  0 (0.00) | **<0.001** | 74 (86.05)  12 (13.95) | 34 (100.00)  0 (0.00) | **0.022** |
| Reiber index, mean (SD) | -0.49 (0.78) | 2.37 (3.70) | **<0.001** | -0.11 (1.01) | 3.94 (4.46) | **<0.001** |
| Blood-CSF barrier damage index (QAlbx100) | 0.55 (0.25) | 0.49 (0.30) | 0.245 | 0.51 (0.24) | 0.53 (0.36) | 0.686 |
| CSF cells (cells/µL) | 6.30 (17.33) | 11.89 (17.80) | 0.087 | 6.25 (14.54) | 16.94 (22.55) | **0.003** |
| EDSS at onset, mean (SD) | 1.99 (1.07) | 1.99 (0.96) | 0.995 | 1.97 (1.04) | 2.04 (0.95) | 0.722 |
| FS involved at onset, n (%)  Visual  Sensory  Motor  Sensorimotor  Brainstem/Cerebell.  Multisystem  Other* | 13 (24.53)  17 (32.08)  2 (3.77)  8 (15.09)  10 (18.87)  1 (1.89)  2 (3.77) | 10 (16.13)  16 (25.81)  1 (1.61)  10 816.13)  17 (27.42)  6 (9.68)  2 (3.23) | 0.458 | 16 (19.51)  23 (28.05)  2 (2.44)  14 (17.07)  21 (25.61)  3 (3.66)  3 (3.66) | 7 (21.21)  10 (30.30)  1 (3.03)  4 (12.12)  6 (18.18)  4 (12.12)  1 (3.03) | 0.700 |
| Recovery after first event, n (%)  Complete  Incomplete | 23 (41.07)  33 (58.93) | 33 (51.56)  31 (48.44) | 0.250 | 38 (44.19)  48 (55.81) | 18 (52.94)  16 (47.06) | 0.386 |
| Spinal cord onset, n (%)  Yes  No | 14 (26.92)  38 ( 73.08) | 22 (34.92)  41 (65.08) | 0.357 | 23 (28.40)  58 (71.60) | 13 (38.24)  21 (61.76) | 0.299 |
| T2/FLAIR lesion number at baseline, n (%)  0  1-2  3-8  9-20  >20 | 2 (3.57)  9 (16.07)  15 (26.79)  17 (30.36)  13 (23.21) | 0 (0)  1 (1.56)  15 (23.44)  25 (39.06)  23 (35.94) | **0.016** | 2 (2.33)  10 (11.63)  22 (25.58)  28 (32.56)  24 (27.91) | 0 (0)  0 (0)  8 (23.53)  14 (41.18)  12 (35.29) | 0.219 |
| GdE lesion number at baseline | 0.79 (1.61) | 1.23 (2.31) | 0.232 | 0.73 (1.65) | 1.73 (2.60) | **0.016** |
| Presence of infratentorial lesions at baseline, n (%)  Yes  No | 32 (57.14)  24 (42.86) | 49 (76.56)  15 (23.44) | **0.023** | 56 (65.12)  30 (34.88) | 25 (73.53)  9 (26.47) | 0.375 |
| At least one relapse, n (%)  Yes  No | 17 (30.36)  39 (69.64) | 20 (31.25)  44 (68.75) | 0.916 | 26 (30.23)  60 (69.77) | 11 (32.35)  23 (67.65) | 0.821 |
| EDSS at last FU, mean (SD) | 1.24 (1.25) | 1.59 (1.53) | 0.174 | 1.26 (1.19) | 1.87 (1.81) | **0.032** |
| NEDA3 status at last FU, n (%)  Yes  No | 21 (37.50)  35 (62.50) | 10 (15.62)  54 (84.38) | **0.006** | 26 (30.23)  60 (69.77) | 5 (14.71)  29 (85.29) | 0.080 |
| HET initiation during FU, n (%)  Yes  No | 10 (17.86)  46 (82.14) | 31 (48.44)  33 (51.56) | **<0.001** | 23 (26.74)  63 (73.26) | 18 (52.94)  16 (47.06) | **0.006** |
| MET treatment failure, n (%)  Yes  No | 13 (29.55)  31 (70.45) | 26 (42.62)  35 (57.38) | 0.171 | 26 (36.62)  45 (63.38) | 13 (38.24)  21 (61.76) | 0.873 |

GdE lesion number was similarly categorized in 3 groups (0, 1-2 and >2 lesions). Statistically significant p-value results are in bold. OCB: oligoclonal bands; CSF: cerebrospinal fluid; Qalb: albumin quotient; EDSS: expanded disability status scale; Cerebell.: cerebellar; FS: functional system; GdE: gadolinium-enhancing; DMT: disease modifying therapy; FU: follow-up; NEDA3: no evidence of disease activity 3; HET: high-efficacy therapy. *Other: 2 patients with visual field deficit as a result of optic radiation lesion, 1 patient with seizure-like symptoms, 1 patient with paroxysmal tremor, hemiparesis and tremor. Visual onset refers to optic neuritis only.

**Supplementary Table 2.** Results of multivariable Cox regression analyses for NEDA3 loss with Kappa Index≥100 cut-off.

| Variable | HR - Multivariable | p-value |
| --- | --- | --- |
| Age at onset | 0.98 (0.96-1.00) | p 0.050 |
| Sex (M/F) | 1.18 (0.73-1.90) | p 0.505 |
| EDSS at onset | 0.99 (0.76-1.27) | p 0.910 |
| T2/FLAIR lesion number at baseline | 1.19 (0.91-1.56) | p 0.108 |
| GdE lesion number at baseline | 1.31 (0.96-1.78) | p 0.087 |
| Spinal cord onset | 0.75 (0.46-1.23) | p 0.254 |
| Infratentorial lesions at baseline | 0.87 (0.51-1.49) | p 0.619 |
| Incomplete recovery after onset | 1.58 (0.97-2.58) | p 0.066 |
| Kappa Index≥100 | 1.41 (0.87-2.28) | p 0.158 |

Statistically significant p-value results are bold. Hazard Ratio 95% Confidence Interval is in brackets. HR: hazard ratio; EDSS: expanded disability status scale; GdE: gadolinium-enhancing

**Supplementary Table 3.** Results of multivariable Cox regression analyses for HET initiation with Kappa Index≥100 cut-off.

| Variable | HR - Multivariable | p-value |
| --- | --- | --- |
| Age at onset | 0.93 (0.90-0.96) | **p<0.001** |
| Sex (M/F) | 0.90 (0.45-1.79) | p 0.759 |
| EDSS at onset | 1.83 (1.13-2.96) | **p 0.014** |
| T2/FLAIR lesion number at baseline | 1.53 (0.96-2-45) | p 0.072 |
| GdE lesion number at baseline | 0.77 (0.48-1.23) | p 0.277 |
| Spinal cord onset | 1.54 (0.80-2.99) | p 0.200 |
| Infratentorial lesions at baseline | 1.43 (0.58-3.50) | p 0.438 |
| Incomplete recovery after onset | 1.91 (0.85-4.25) | p 0.115 |
| Kappa Index≥100 | 2.78 (1.42-5.45) | **p 0.003** |

Statistically significant p-value results are bold. Hazard Ratio 95% Confidence Interval is in brackets. HR: hazard ratio; EDSS: expanded disability status scale; GdE: gadolinium-enhancing

**Supplementary Table 4.** Results of univariable and multivariable Cox regression analyses for HET initiation in a MET-only patient population, with Kappa Index≥38 cut-off.

| Variable | HR - Univariable | p-value | HR - Multivariable | p-value |
| --- | --- | --- | --- | --- |
| Age at onset | 0.95 (0.91-0.98) | **p 0.003** | 0.94 (0.90-0.98) | **p 0.001** |
| Sex (M/F) | 1.23 (0.61-2.49) | p 0.568 | 0.94 (0.42-2.09) | p 0.877 |
| EDSS at onset | 1.46 (1.00-2-13) | p 0.053 | 1.39 (0.80-2.41) | p 0.243 |
| T2/FLAIR lesion number at baseline | 1.21 (0.84-1.75) | p 0.304 | 1.13 (0.68-1.89) | p 0.638 |
| GdE lesion number at baseline | 1.23 (0.79-1.89) | p 0.360 | 0.76 (0.45-1.29) | p 0.310 |
| Spinal cord onset | 1.18 (0.58-2.43) | p 0.646 | 1.20 (0.56-2-58) | p 0.643 |
| Infratentorial lesions at baseline | 2.49 (1.03-6.02) | **p 0.043** | 2.25 (0.78-6.49) | p 0.134 |
| Incomplete recovery after onset | 2.71 (1.22-6.00) | **p 0.014** | 3.25 (1.32-7.99) | **p 0.010** |
| Kappa Index≥38 | 2.36 (1.11-4.98) | **p 0.025** | 2.54 (1.17-5.51) | **p 0.018** |

Statistically significant p-value results are bold. Hazard Ratio 95% Confidence Interval is in brackets. HR: hazard ratio; EDSS: expanded disability status scale; GdE: gadolinium-enhancing

**Supplementary Table 5.** Results of univariable and multivariable Cox regression analyses for HET initiation in a MET-only patient population, with Kappa Index≥100 cut-off*.*

| Variable | HR - Univariable | p-value | HR - Multivariable | p-value |
| --- | --- | --- | --- | --- |
| Age at onset | 0.95 (0.91-0.98) | **p 0.003** | 0.94 (0.90-0.97) | **p 0.001** |
| Sex (M/F) | 1.23 (0.61-2.49) | p 0.568 | 1.07 (0.49-2.31) | p 0.874 |
| EDSS at onset | 1.46 (1.00-2-13) | p 0.053 | 1.42 (0.83-2.40) | p 0.197 |
| T2/FLAIR lesion number at baseline | 1.21 (0.84-1.75) | p 0.304 | 1.10 (0.67-1.83) | p 0.700 |
| GdE lesion number at baseline | 1.23 (0.79-1.89) | p 0.360 | 0.73 (0.42-1.26) | p 0.263 |
| Spinal cord onset | 1.18 (0.58-2.43) | p 0.646 | 1.37 (0.65-2.91) | p 0.412 |
| Infratentorial lesions at baseline | 2.49 (1.03-6.02) | **p 0.043** | 2.20 (0.79-6.13) | p 0.130 |
| Incomplete recovery after onset | 2.71 (1.22-6.00) | **p 0.014** | 3.50 (1.36-9.00) | **p 0.009** |
| Kappa Index≥100 | 1.79 (0.90-3.56) | p 0.095 | 2.59 (1.21-5.54) | **p 0.014** |

Statistically significant p-value results are bold. Hazard Ratio 95% Confidence Interval is in brackets. HR: hazard ratio; EDSS: expanded disability status scale; GdE: gadolinium-enhancing
